# Supplementary material for: Evaluation of a Vaccine Candidate Designed for Broad-Spectrum Protection against Type A Foot-and-Mouth Disease in Asia
Source: MDPI journal article supplement (doi:10.3390/vaccines12010064), 2024-01-09
Supplement: s1 [file s1]

## Challenge

## Survival (%)

## Body weight (%)

A/Sea-97/G1  
A/POC/2010

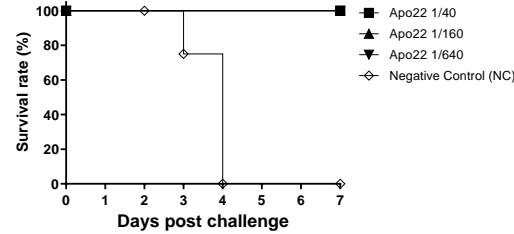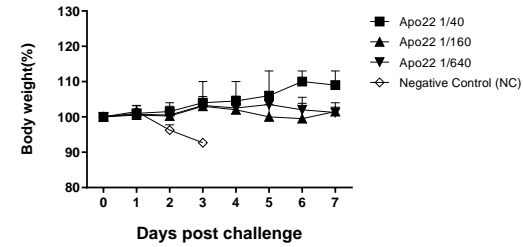

A/Sea-97/G2  
A/GP/2018

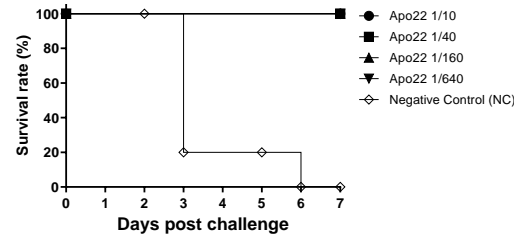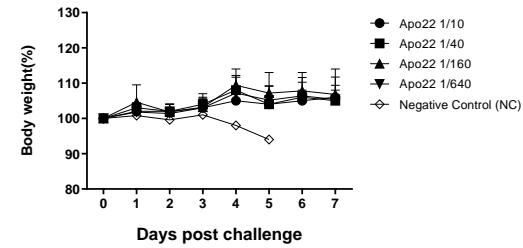

A/Sea/G2  
A22 Iraq

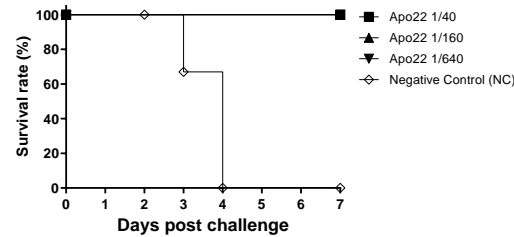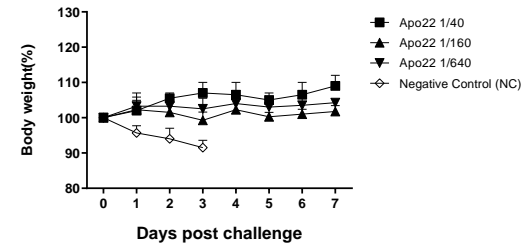

A/ASIA/G-III  
A/NEP/2017

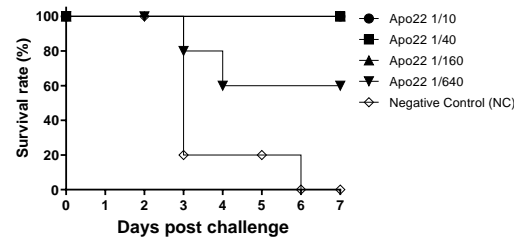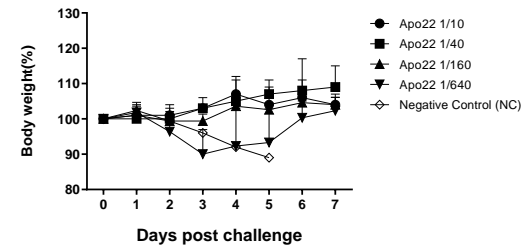

**Supplementary Figure 1 : Determination of 50% protective dose against virus challenge in the C57BL/6 mice immunized with Apo22 vaccine.**  
The survival rate and change of body weight with  $1 \times 10^5$  TCID<sub>50</sub>/0.1 mL of A/POC/2010, A/GP/2018 or A/NEP/2017.

## Challenge

A/Sea-97/G1  
A/POC/2010

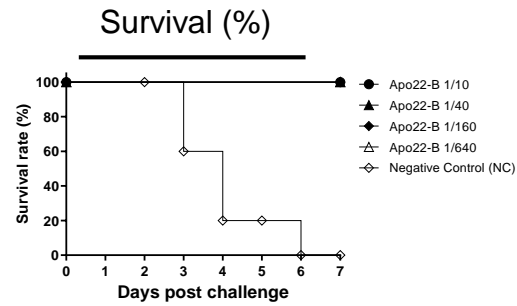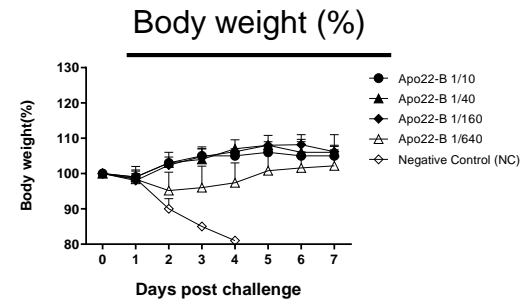

A/Sea-97/G2  
A/GP/2018

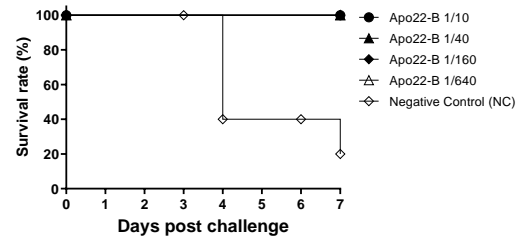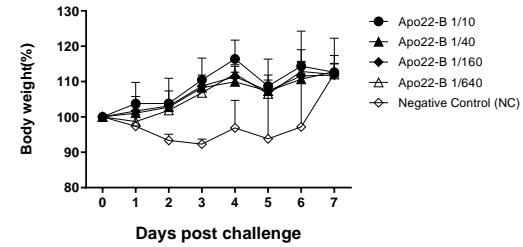

A/Sea/G2  
A22 Iraq

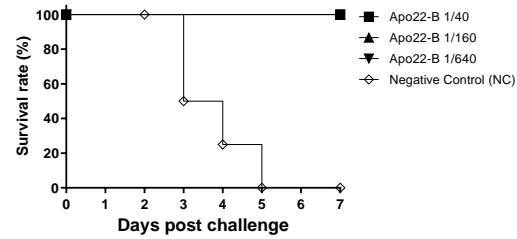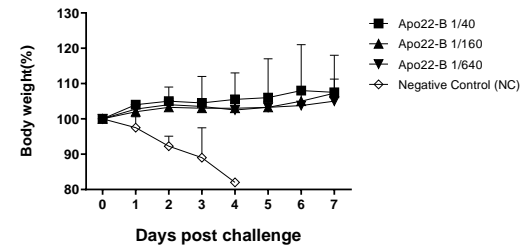

A/ASIA/G-VII  
A/NEP/2017

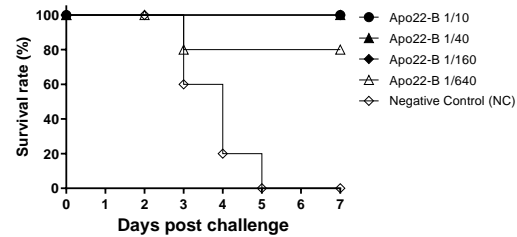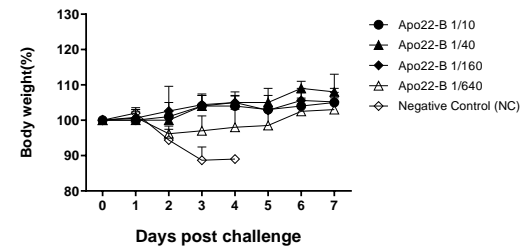

**Supplementary Figure 2 : Determination of 50% protective dose against virus challenge in the C57BL/6 mice immunized with Apo22-B vaccine.**

The survival rate and change of body weight with  $1 \times 10^5$  TCID<sub>50</sub>/0.1 mL of A/POC/2010, A/GP/2018 or A/NEP/2017.
